# Supplementary material
Source: HighWire-hosted journal article supplement (https://jcp.bmjjournals.com/content/suppl/2008/08/11/61.9.1034)
Supplement: 6191034webonlyapp1.pdf [file 6191034webonlyapp1.pdf]

Supplementary table 1: Immunohistochemical and molecular findings in classical and simplex/differentiated VINs, invasive squamous cell carcinomas and in two cases of extramammary M. Paget. According to the WHO classification, usual type VIN cases 1-4 represented VIN 2 lesions, cases 5-27 VIN 3 lesions.

| <b>Case No.</b> | <b>Age</b> | <b>Histology</b>   | <b>HPV</b> | <b>p16 IHC</b> | <b>p53 IHC</b> | <b>p53 mutation</b>   | <b>3q26/cen7</b> |
|-----------------|------------|--------------------|------------|----------------|----------------|-----------------------|------------------|
| 1               | 63         | usual type VIN     | 16         | +++            | 0              | -                     | NA               |
| 2               | 72         | usual type VIN     | 16         | +++            | 5              | -                     | 0.94             |
| 3               | 48         | usual type VIN     | 16         | +++            | 0              | -                     | 0.95             |
| 4               | 37         | usual type VIN     | 16         | +++            | 0              | -                     | 0.89             |
| 5               | 35         | usual type VIN     | 16         | +++            | 0              | -                     | 0.77             |
| 6               | 46         | usual type VIN     | 16         | +++            | 0              | -                     | 1.48             |
| 7               | 75         | usual type VIN     | -          | -              | 30             | -                     | 1.02             |
| 8               | 70         | usual type VIN     | 16         | +++            | 0              | -                     | 1.53             |
| 9               | 45         | usual type VIN     | 16         | +++            | 0              | -                     | 0.94             |
| 10              | 51         | usual type VIN     | 16         | ++             | 0              | -                     | 1.38             |
| 11              | 60         | usual type VIN     | -          | +++            | 0              | -                     | 1.22             |
| 12              | 53         | usual type VIN     | 16         | +++            | 0              | -                     | 1.62             |
| 13              | 75         | usual type VIN     | 18         | +++            | 0              | -                     | 1.34             |
| 14              | 52         | usual type VIN     | 16         | +++            | 0              | -                     | 1.67             |
| 15              | 47         | usual type VIN     | 16         | +++            | 0              | -                     | 1.00             |
| 16              | 61         | usual type VIN     | -          | -              | 0              | -                     | 1.65             |
| 17              | 69         | usual type VIN     | 16         | +++            | 0              | -                     | 1.69             |
| 18              | 67         | usual type VIN     | 16         | +++            | 0              | -                     | 2.05             |
| 19              | 38         | usual type VIN     | 16+6/11    | +++            | 0              | -                     | 1.04             |
| 20              | 45         | usual type VIN     | -          | +++            | 0              | -                     | 0.99             |
| 21              | 17         | usual type VIN     | 16         | +++            | 0              | -                     | 0.99             |
| 22              | 46         | usual type VIN     | 16         | +++            | 0              | -                     | 1.32             |
| 23              | 72         | usual type VIN     | -          | -              | 90             | Ex.8 T1072->G (V274G) | NA               |
| 24              | 40         | usual type VIN     | 16         | +++            | 0              | -                     | NA               |
| 25              | 36         | usual type VIN     | -          | +++            | 20             | -                     | 1.11             |
| 26              | 29         | usual type VIN     | 16         | +++            | 0              | -                     | 1.08             |
| 27              | 83         | usual type VIN     | -          | -              | 80             | Ex.7 G985->A (G245D)  | 2.34             |
| 28              | 73         | differentiated VIN | -          | -              | 90             | -                     | 1.33             |
| 29              | 75         | differentiated VIN | -          | -              | 30             | -                     | 1.93             |
| 30              | 77         | differentiated VIN | -          | -              | 90             | -                     | 2.78             |
| 31              | 54         | differentiated VIN | -          | -              | 0              | -                     | 1.79             |
| 32              | 61         | differentiated VIN | -          | -              | 0              | -                     | 1.4              |

| <b>Case No.</b> | <b>Age</b> | <b>Histology</b>        | <b>HPV</b> | <b>p16 IHC</b> | <b>p53 IHC</b> | <b>p53 mutation</b>     | <b>3q26/en7</b> |
|-----------------|------------|-------------------------|------------|----------------|----------------|-------------------------|-----------------|
| 33              | 70         | keratinizing SCC G1     | -          | ++             | 0              | -                       | 1.29            |
| 34              | 45         | non-keratinizing SCC G3 | -          | +++            | 90             | -                       | 1.15            |
| 35              | 77         | keratinizing SCC G1     | -          | -              | 90             | -                       | 1.66            |
| 36              | 47         | keratinizing SCC G2     | -          | ++             | 100            | Ex.7 G981->T (G244C)    | 1.39            |
| 37              | 45         | non-keratinizing SCC G3 | -          | +++            | 5              | -                       | 1.01            |
| 38              | 86         | non-keratinizing SCC G3 | 6/11       | +++            | 40             | -                       | 1.03            |
| 39              | 84         | keratinizing SCC G2     | -          | -              | 80             | -                       | 1.23            |
| 40              | 34         | non-keratinizing SCC G3 | -          | -              | 90             | -                       | 1.88            |
| 41              | 78         | keratinizing SCC G2     | -          | ++             | 0              | -                       | 0.87            |
| 42              | 80         | keratinizing SCC G2     | -          | +++            | 15             | -                       | 1.30            |
| 43              | 42         | non-keratinizing SCC G2 | -          | -              | 0              | -                       | 1.39            |
| 44              | 74         | keratinizing SCC G1     | -          | ++             | 0              | -                       | 1.81            |
| 45              | 75         | basaloid SCC G3         | 33         | +++            | 0              | -                       | 1.76            |
| 46              | 73         | keratinizing SCC G2     | -          | -              | 90             | -                       | 1.21            |
| 47              | 45         | keratinizing SCC G2     | -          | ++             | 0              | Ex.5 C657->T (Q136Stop) | 2.87            |
| 48              | 35         | keratinizing SCC G1     | -          | ++             | 0              | Ex.4 G409->A (W53Stop)  | 1.53            |
| 49              | 64         | keratinizing SCC G2     | -          | +++            | 90             | -                       | 1.70            |
| 50              | 64         | keratinizing SCC G2     | -          | ++             | 80             | -                       | 1.84            |
| 51              | 37         | basaloid SCC G3         | 16         | +++            | 0              | -                       | 1.11            |
| 52              | 55         | keratinizing SCC G2     | -          | +              | 0              | -                       | 1.36            |
| 53              | 43         | keratinizing SCC G2     | -          | ++             | 0              | -                       | 1.39            |
| 54              | 54         | non-keratinizing SCC G3 | -          | ++             | 100            | Ex.5 G758->A (C176Y)    | 2.04            |
| 55              | 40         | warty SCC G2            | 16         | +++            | 0              | -                       | 1.93            |
| 56              | 75         | keratinizing SCC G1     | -          | -              | 60             | -                       | 1.66            |
| 57              | 31         | keratinizing SCC G2     | -          | +++            | 80             | -                       | 1.76            |
| 58              | 45         | keratinizing SCC G2     | -          | ++             | 0              | -                       | NA              |
| 59              | 61         | keratinizing SCC G1     | -          | +              | 60             | -                       | 2.28            |
| 60              | 38         | keratinizing SCC G2     | 16         | +++            | 0              | -                       | 2.00            |
| 61              | 83         | M. Paget                | -          | -              | 10             | -                       | 0.61            |
| 62              | 77         | M. Paget                | -          | -              | 0              | -                       | 1.00            |
